# Supplementary material for: Concomitant dysregulation of the estrogen receptor and BRAF/MEK signaling pathways is common in colorectal cancer and predicts a worse prognosis
Source: Springer Nature journal article supplement (doi:10.1007/s13402-018-00420-0), 2019-01-15
Supplement: MOESM2 [file 16399308]

## Sheet: Hippo pathway
Intercept	Probeset	Coefficient
-1.681	201289_at	-0.1944
	210764_s_at	-0.19432
	210767_at	0.140148
	204991_s_at	0.140136
	211091_s_at	0.140127
	211092_s_at	0.140124
	211017_s_at	0.140123
	203002_at	-0.11721
	206801_at	-0.11228
	217173_s_at	-0.08601
	202067_s_at	-0.08595
	202068_s_at	-0.08574
	221667_s_at	-0.08226
	205904_at	-0.0626
	205905_s_at	-0.05985
	201450_s_at	0.055823
	201446_s_at	0.055778
	205699_at	0.054969
	205698_s_at	0.054952
	201056_at	0.051936
	201057_s_at	0.05192
	211989_at	0.046536
	211988_at	0.046512
	210858_x_at	0.046019
	212672_at	0.046014
	208442_s_at	0.045972
	204750_s_at	0.040657
	204751_x_at	0.040555
	221249_s_at	-0.03991
	202392_s_at	-0.03878
	219558_at	-0.03695
	212297_at	-0.03694
	210968_s_at	-0.03593
	211509_s_at	-0.03589
	214629_x_at	-0.03589
	219590_x_at	0.035677
	222360_at	0.035644
	202049_s_at	0.035006
	202051_s_at	0.035005
	202050_s_at	0.034989
	218645_at	0.034779
	210010_s_at	-0.03453
	207870_at	0.034066
	210962_s_at	0.034062
	218783_at	0.033133
	222250_s_at	0.033107
	205967_at	0.032669
	218177_at	-0.03247
	218178_s_at	-0.03247
	220917_s_at	0.032341
	201682_at	0.032333
	200924_s_at	-0.03023
	212860_at	-0.02984
	218424_s_at	0.029157
	201977_s_at	0.028951
	201978_s_at	0.028949
	211992_at	0.028757
	211993_at	0.028746
	211994_at	0.02874
	218971_s_at	0.027046
	222351_at	-0.026
	202884_s_at	-0.026
	202885_s_at	-0.02598
	202886_s_at	-0.02595
	202883_s_at	-0.02591
	200783_s_at	-0.02573
	39854_r_at	-0.0248
	218018_at	-0.02477
	218019_s_at	-0.02476
	202671_s_at	-0.02475
	203340_s_at	0.023823
	203339_at	0.023812
	201955_at	-0.02253
	218208_at	-0.02219
	217766_s_at	0.01976
	209021_x_at	0.019476
	203363_s_at	0.019459
	203364_s_at	0.019439
	220806_x_at	-0.01921
	208826_x_at	0.018713
	207721_x_at	0.018701
	200093_s_at	0.018692
	202586_at	-0.01802
	211730_s_at	-0.018
	211376_s_at	0.017638
	219067_s_at	0.017627
	208678_at	-0.01751
	221956_at	-0.01735
	222017_x_at	-0.01735
	90610_at	-0.01733
	204692_at	-0.01733
	208772_at	0.016906
	208773_s_at	0.016903
	219081_at	0.016879
	214919_s_at	0.016874
	220271_x_at	0.016779
	219821_s_at	-0.01606
	204477_at	0.015726
	201123_s_at	-0.01534
	220326_s_at	0.010344

## Sheet: Notch pathway
Intercept	Probeset	Coefficient
-28.987	203394_s_at	0.305762
	203395_s_at	0.247628
	202628_s_at	0.203679
	202627_s_at	0.170678
	221011_s_at	0.167403
	201473_at	0.152908
	219480_at	0.12341
	221009_s_at	0.119222
	217875_s_at	0.115113
	205313_at	0.0865
	218544_s_at	0.086072
	204633_s_at	-0.08529
	205807_s_at	0.082365
	205398_s_at	0.080174
	218284_at	0.080028
	221766_s_at	-0.07436
	209305_s_at	0.07379
	201565_s_at	-0.07278
	212614_at	-0.07256
	201170_s_at	0.071589
	44783_s_at	0.071201
	204334_at	0.069965
	202388_at	-0.06421
	207760_s_at	0.063553
	211020_at	-0.0623
	218980_at	0.06179
	206558_at	0.061555
	209301_at	-0.06119
	202023_at	0.05886
	206457_s_at	0.058535
	218574_s_at	0.05773
	204197_s_at	0.057123
	202657_s_at	-0.05667
	202081_at	0.056488
	213039_at	0.056011
	32137_at	0.055177
	211149_at	-0.05506
	216061_x_at	0.054894
	205100_at	0.054097
	217561_at	0.052994
	221705_s_at	-0.05264
	211827_s_at	0.051465
	206204_at	-0.0502
	209121_x_at	-0.05
	214444_s_at	0.049541
	218205_s_at	0.048883
	214331_at	-0.04862
	202850_at	-0.04841
	212849_at	0.047291
	202539_s_at	-0.04702
	32094_at	0.046649
	201464_x_at	0.046497
	207191_s_at	0.046282
	209519_at	-0.046
	212276_at	-0.04503
	200878_at	0.043896
	201416_at	0.043831
	202440_s_at	0.043234
	219565_at	-0.04282
	205768_s_at	-0.04219
	212838_at	0.04147
	206947_at	0.040394
	204436_at	0.04016
	221063_x_at	0.039985
	204682_at	0.039942
	214017_s_at	0.039571
	212724_at	0.039428
	222240_s_at	0.037874
	204382_at	0.037283
	206635_at	0.037113
	219058_x_at	0.035726
	221445_at	0.035614
	208944_at	-0.03545
	214762_at	0.034872
	208523_x_at	-0.03215
	222236_s_at	0.031992
	216272_x_at	0.031864
	202675_at	-0.0318
	201934_at	0.031716
	202665_s_at	0.031622
	219542_at	0.031611
	203315_at	0.030187
	220670_at	0.029341
	201370_s_at	-0.02838
	212471_at	0.027698
	218335_x_at	0.026829
	203621_at	-0.02665
	212256_at	0.026437
	221685_s_at	0.025342
	217983_s_at	-0.02521
	206392_s_at	-0.0249
	221485_at	0.024471
	202679_at	-0.02428
	209191_at	0.02419
	208855_s_at	0.024078
	200920_s_at	-0.02251
	208916_at	0.021465
	212895_s_at	0.021447
	204185_x_at	-0.02116
	211939_x_at	-0.00738

## Sheet: RMA-based BRAF pathway
Intercept	Probeset	Coefficient
-6.361	208893_s_at	0.052073
	204420_at	0.047865
	204011_at	0.047353
	208891_at	0.046558
	221489_s_at	0.044279
	208892_s_at	0.041129
	201631_s_at	0.039156
	214613_at	0.038385
	203348_s_at	0.03683
	208712_at	0.035307
	203320_at	0.033265
	203349_s_at	0.032219
	209752_at	0.031944
	202498_s_at	0.031831
	204015_s_at	0.028477
	216375_s_at	0.028131
	219970_at	0.027837
	217426_at	0.02767
	210174_at	-0.0267
	221911_at	0.02597
	219643_at	0.025878
	201920_at	0.024845
	207221_at	-0.02395
	202081_at	0.023779
	206952_at	0.023463
	206233_at	0.023388
	203607_at	0.02334
	216802_at	0.022184
	204695_at	0.021031
	202693_s_at	0.020977
	204973_at	0.020841
	209034_at	-0.01987
	214644_at	-0.01926
	214026_s_at	0.018668
	205264_at	0.018508
	201328_at	0.018218
	222374_at	0.017732
	215120_s_at	0.017332
	217061_s_at	0.016157
	221753_at	0.015206
	206501_x_at	0.015194
	46665_at	0.015087
	221752_at	0.014893
	219031_s_at	0.014228
	218247_s_at	0.014038
	213380_x_at	-0.01384
	213633_at	0.013841
	214427_at	0.013821
	207667_s_at	0.013709
	209434_s_at	0.013643
	202770_s_at	-0.01338
	203612_at	0.01329
	210673_x_at	0.012817
	56256_at	-0.0128
	203967_at	0.012066
	209317_at	0.011957
	211559_s_at	-0.01192
	221987_s_at	0.011767
	214454_at	-0.01163
	205692_s_at	0.011632
	218775_s_at	0.01119
	213793_s_at	0.011151
	218590_at	0.011129
	201904_s_at	0.010849
	220717_at	0.010402
	220651_s_at	0.010133
	203480_s_at	0.01013
	221983_at	-0.00994
	201197_at	0.009827
	204275_at	0.009734
	203968_s_at	0.009392
	218239_s_at	0.00935
	207042_at	0.00886
	212272_at	-0.00875
	218156_s_at	0.008424
	212564_at	-0.00838
	209433_s_at	0.008361
	221688_s_at	0.008266
	214144_at	0.00825
	206636_at	0.008231
	48825_at	-0.00813
	204568_at	-0.00812
	218769_s_at	-0.00777
	201277_s_at	0.00767
	218037_at	-0.00764
	209271_at	-0.00763
	218431_at	-0.00746
	202378_s_at	0.007363
	221931_s_at	0.007317
	205198_s_at	-0.00643
	217557_s_at	-0.00634
	211162_x_at	-0.00608
	203345_s_at	0.006036
	209622_at	-0.00596
	221020_s_at	0.005809
	211569_s_at	-0.00462
	212216_at	-0.00454
	201144_s_at	0.004508
	203346_s_at	0.004373
	213254_at	-0.00422
